# Supplementary material
Source: PubMed Central journal article supplement (PMC8320355)
Supplement: NIHMS1665097-supplement-Online_Supplement.pdf [file NIHMS1665097-supplement-Online_Supplement.pdf]

## ONLINE SUPPLEMENTAL MATERIAL

### **Treatment of Primary Aldosteronism Increases Plasma Epoxyeicosatrienoic Acids**

James M. Luther,<sup>1</sup> Dawei S. Wei,<sup>1</sup> Kakali Ghoshal,<sup>2</sup> Dungeng Peng,<sup>1</sup> Gail K. Adler,<sup>3</sup> Adina F. Turcu,<sup>4</sup> Hui Nian,<sup>5</sup> Chang Yu,<sup>5</sup> Carmen C. Solorzano,<sup>6</sup> Ambra Pozzi,<sup>2,7</sup> Nancy J. Brown<sup>1,8</sup>

<sup>1</sup> Vanderbilt University Medical Center Department of Medicine, Division of Clinical Pharmacology

<sup>2</sup> Vanderbilt University Medical Center Department of Medicine, Division of Nephrology and Hypertension

<sup>3</sup> Brigham and Women's Hospital, Division of Endocrinology and Hypertension, Department of Medicine, Harvard Medical School

<sup>4</sup> University of Michigan, Division of Endocrinology, Department of Medicine

<sup>5</sup> Vanderbilt University Department of Biostatistics

<sup>7</sup> Department of Veterans Affairs, Nashville, TN

<sup>8</sup> Yale School of Medicine

**Short Title: Aldosterone decreases epoxyeicosatrienoic acids**

**Table S1. qPCR Primer Sequences**

| <b>Gene</b>         | <b>Primers</b>                                                             | <b>PCR conditions</b>                                                                   |
|---------------------|----------------------------------------------------------------------------|-----------------------------------------------------------------------------------------|
| <b><i>Ephx2</i></b> | Forward 5' CTGGCCCTCCCCTCTATCG 3'<br>Reverse 5' GCACCAAGCAGGAAGTCTCT 3'    | 95°C for 3 min, 1 cycle<br>95°C for 30s }<br>55°C for 30s } 40 cycles<br>72°C for 30s } |
| <b><i>GAPDH</i></b> | Forward: 5' GTGGTGAAGCAGGCATCTGA 3'<br>Reverse: 5' AGGAGACAACCTGGTCCTCA 3' | According to the PCR<br>conditions of respective<br>gene.                               |

**Table S2: Baseline characteristics of patients with primary aldosteronism grouped by subsequent treatment.**

| <b>Measure</b>                       | <b>Adrenalectomy</b><br>(n=6) | <b>MRA</b><br>(n=3) | <b>All</b><br>(n=9) |
|--------------------------------------|-------------------------------|---------------------|---------------------|
| Age (years)                          | 52.4 ± 7.8                    | 44.0 ± 12.2         | 49.6 ± 9.6          |
| Gender, female (%)                   | 3 (50%)                       | 1 (33%)             | 4/9 (44%)           |
| Race, n (%)                          |                               |                     |                     |
| White                                | 5/6 (83%)                     | 1/3 (33%)           | 6/9 (67%)           |
| African American                     | 1/6 (17%)                     | 2/3 (67%)           | 3/9 (33%)           |
| Body mass index (kg/m <sup>2</sup> ) | 26.5 ± 2.9                    | 33.9 ± 6.3          | 29.0 ± 5.3          |
| Systolic blood pressure (mmHg)       | 139.0 ± 16.4                  | 144.3 ± 5.5         | 140.8 ± 13.5        |
| Diastolic blood pressure (mmHg)      | 86.0 ± 7.2                    | 82.3 ± 10.3         | 84.8 ± 7.9          |
| Heart rate (bpm)                     | 66.0 ± 12.0                   | 73.0 ± 7.2          | 68.3 ± 10.8         |
| PAC (ng/dL)                          | 39.3±40.7                     | 21.0±3.8            | 33.2±33.5           |
| PRA (ng/mL/hr)                       | 0.23 ± 0.18                   | 0.40 ± 0.14         | 0.28 ± 0.18         |
| PAC:PRA ratio (ng/dL per ng/ml/hr)   | 197.9±81.8                    | 41.2±13.5           | 153.2±101.7         |

Continuous variables are reported as mean ± SD

MRA, mineralocorticoid receptor antagonist; PAC, plasma aldosterone concentration; PRA, plasma renin activity

**Table S3: Characteristics of patients with primary aldosteronism prior to and three to twelve months following treatment.**

| <b>Measure</b>                 | <b>Pre-treatment</b> | <b>Treated</b> | <b>P-value</b> |
|--------------------------------|----------------------|----------------|----------------|
| Weight (kg)                    | 87.7 ± 23.0          | 89.3 ± 22.1    | 0.25           |
| SBP (mmHg)                     | 131.1 ± 10.8         | 124.3 ± 23.1   | 0.43           |
| DBP (mmHg)                     | 81.5 ± 8.2           | 77.1 ± 15.0    | 0.36           |
| HR (bpm)                       | 61.3 ± 7.2           | 59.6 ± 6.2     | 0.30           |
| Serum Potassium (mmol/L)       | 3.7 ± 0.2            | 4.1 ± 0.4      | 0.06           |
| Creatinine (mg/dL)             | 1.09 ± 0.05          | 1.21 ± 0.13    | 0.35           |
| Aldosterone (ng/dL)            | 20.41 ± 15.20        | 6.16 ± 3.68    | 0.02           |
| 11-deoxycorticosterone (pg/mL) | 47.4±34.1            | 16.6±19.3      | 0.02           |
| Cortisol (µg/dL)               | 9.7±2.7              | 9.1±2.6        | 0.57           |
| ACTH (pg/mL)                   | 40.4 ± 7.5           | 46.6 ± 16.0    | 0.25           |
| Glucose (mg/dL)                | 93.2 ± 10.8          | 94.0 ± 10.5    | 0.82           |
| Insulin (µU/mL)                | 10.2 ± 2.7           | 13.9 ± 6.2     | 0.13           |
| C-peptide (ng/mL)              | 1.6 ± 0.5            | 2.1 ± 0.7      | 0.13           |
| Body fat (%)                   | 35.3 ± 6.5           | 36.7 ± 6.5     | 0.06           |
| Body fat, Gynoid (%)           | 39.0 ± 9.0           | 39.2 ± 9.9     | 1.0            |
| Body fat, Android (%)          | 40.4 ± 9.2           | 43.2 ± 9.7     | 0.02           |

Continuous variables are reported as mean ± SD.

SBP indicate systolic blood pressure, DBP diastolic blood pressure, HR heart rate

**Table S4. Plasma sEH activity in patients with primary aldosteronism, determined by substrate incubation**

| Measure                     | Pre-Treatment   | Post-Treatment  | Within-Subject $\Delta$ | P-value |
|-----------------------------|-----------------|-----------------|-------------------------|---------|
| sEH Activity (11,12-DHET)   | 1.86 $\pm$ 0.63 | 1.80 $\pm$ 0.67 | -0.06 $\pm$ 0.38        | 0.91    |
| sEH Activity (12,13-DiHOME) | 2.15 $\pm$ 0.97 | 2.51 $\pm$ 1.42 | 0.35 $\pm$ 1.11         | 0.36    |
| sEH Activity (14,15-DHET)   | 3.21 $\pm$ 1.18 | 2.88 $\pm$ 1.12 | -0.33 $\pm$ 1.12        | 0.82    |
| sEH Activity (14,15-DiHOME) | 2.69 $\pm$ 1.16 | 2.60 $\pm$ 1.13 | -0.09 $\pm$ 0.72        | 0.82    |
| sEH Activity (8,9-DHET)     | 0.66 $\pm$ 0.09 | 0.80 $\pm$ 0.09 | 0.14 $\pm$ 0.12         | 0.027   |

Wilcoxon signed-rank test. Results are mean $\pm$ SD

**Table S5. Plasma sEH activity in patients with primary aldosteronism, estimated by endogenous plasma eicosanoid ratios**

| Measure                     | Pre-Treatment   | Post-Treatment  | Within-Subject $\Delta$ | P-value |
|-----------------------------|-----------------|-----------------|-------------------------|---------|
| Total DHET:(DHET+EET)       | 0.37 $\pm$ 0.08 | 0.33 $\pm$ 0.07 | -0.04 $\pm$ 0.06        | 0.074   |
| 8,9-DHET:(DHET+EET)         | 0.40 $\pm$ 0.05 | 0.41 $\pm$ 0.04 | 0.01 $\pm$ 0.07         | 0.82    |
| 11,12-DHET:(DHET+EET)       | 0.43 $\pm$ 0.06 | 0.41 $\pm$ 0.04 | -0.03 $\pm$ 0.06        | 0.20    |
| 14,15-DHET:(DHET+EET)       | 0.27 $\pm$ 0.14 | 0.23 $\pm$ 0.13 | -0.04 $\pm$ 0.09        | 0.16    |
| Total DiHOME:(DiHOME+EpOME) | 0.39 $\pm$ 0.08 | 0.38 $\pm$ 0.10 | -0.01 $\pm$ 0.06        | 0.57    |
| 9,10-DiHOME:(DiHOME+EpOME)  | 0.39 $\pm$ 0.07 | 0.38 $\pm$ 0.09 | -0.02 $\pm$ 0.06        | 0.43    |
| 12,13-DiHOME:(DiHOME+EpOME) | 0.38 $\pm$ 0.10 | 0.37 $\pm$ 0.11 | -0.01 $\pm$ 0.06        | 0.91    |

Wilcoxon signed-rank test. Results are mean $\pm$ SD

**Table S6: Correlation between epoxyeicosatrienoic acid (EET) concentrations and measures and adrenal steroids.**

| Measure           | 14,15-EET                | 11,12-EET                | 8,9-EET                  | Total EETs               | 14,15-DHET:(DHET+EET)    |
|-------------------|--------------------------|--------------------------|--------------------------|--------------------------|--------------------------|
| ACTH              | $\rho=-0.56$<br>$P=0.11$ | $\rho=-0.5$<br>$P=0.17$  | $\rho=-0.51$<br>$P=0.16$ | $\rho=-0.56$<br>$P=0.11$ | $\rho=-0.5$<br>$P=0.17$  |
| 11-deoxycortisol  | $\rho=-0.56$<br>$P=0.11$ | $\rho=-0.37$<br>$P=0.34$ | $\rho=-0.24$<br>$P=0.67$ | $\rho=-0.49$<br>$P=0.17$ | $\rho=-0.07$<br>$P=0.92$ |
| DOC               | $\rho=-0.21$<br>$P=0.71$ | $\rho=0.01$<br>$P=0.99$  | $\rho=0.01$<br>$P=0.99$  | $\rho=-0.14$<br>$P=0.83$ | $\rho=-0.13$<br>$P=0.85$ |
| Cortisone         | $\rho=-0.18$<br>$P=0.77$ | $\rho=-0.01$<br>$P=0.99$ | $\rho=0.01$<br>$P=0.99$  | $\rho=-0.09$<br>$P=0.92$ | $\rho=-0.07$<br>$P=0.92$ |
| 18OH-Cortisol     | $\rho=-0.1$<br>$P=0.89$  | $\rho=-0.39$<br>$P=0.32$ | $\rho=-0.45$<br>$P=0.22$ | $\rho=-0.18$<br>$P=0.77$ | $\rho=-0.05$<br>$P=0.93$ |
| Testosterone      | $\rho=-0.44$<br>$P=0.25$ | $\rho=-0.3$<br>$P=0.51$  | $\rho=-0.12$<br>$P=0.86$ | $\rho=-0.39$<br>$P=0.32$ | $\rho=0$<br>$P=1.00$     |
| Progesterone      | $\rho=-0.04$<br>$P=0.95$ | $\rho=0.17$<br>$P=0.78$  | $\rho=0.14$<br>$P=0.83$  | $\rho=0.05$<br>$P=0.93$  | $\rho=0.07$<br>$P=0.92$  |
| 17OH-Progesterone | $\rho=-0.11$<br>$P=0.87$ | $\rho=0.24$<br>$P=0.65$  | $\rho=0.21$<br>$P=0.71$  | $\rho=0$<br>$P=1.00$     | $\rho=-0.17$<br>$P=0.79$ |
| Androstenedione   | $\rho=-0.18$<br>$P=0.77$ | $\rho=0.16$<br>$P=0.80$  | $\rho=0.25$<br>$P=0.65$  | $\rho=-0.07$<br>$P=0.92$ | $\rho=-0.14$<br>$P=0.83$ |

*P*-values are adjusted for multiple testing according to Benjamini and Hochberg.  $\rho$  indicates Spearman's rank correlation  $\rho$ . Results for the adrenal steroids Aldosterone, Corticosterone, and Cortisol are presented in the main text.

ACTH, adrenocorticotrophic hormone; DOC, 11-deoxycorticosterone; 18OH-Cortisol, 18-hydroxycortisol; 17OH-Progesterone; 17 $\alpha$ -hydroxyprogesterone

**Table S7. Correlations between ex vivo sEH activity and DHET:(EET+DHET) molar ratios.**

| Measure                     | sEH Activity<br>(14,15-DHET)                | sEH Activity<br>(11,12-DHET)                | sEH Activity<br>(8,9-DHET) | sEH Activity<br>(12,13-DiHOME)              | sEH Activity<br>(14,15-DiHOME)                  |
|-----------------------------|---------------------------------------------|---------------------------------------------|----------------------------|---------------------------------------------|-------------------------------------------------|
| Total DHET:(DHET+EET)       | $\rho=-0.71$<br><b><math>P=0.008</math></b> | $\rho=-0.54$<br>$P=0.076$                   | $\rho=-0.2$<br>$P=0.57$    | $\rho=-0.51$<br>$P=0.10$                    | $\rho=-0.42$<br>$P=0.16$                        |
| Total DiHOME:(DiHOME+EpOME) | $\rho=0.46$<br>$P=0.13$                     | $\rho=0.56$<br>$P=0.066$                    | $\rho=0.22$<br>$P=0.54$    | $\rho=0.47$<br>$P=0.13$                     | $\rho=0.48$<br>$P=0.12$                         |
| 8,9-DHET:(DHET+EET)         | $\rho=0.06$<br>$P=0.86$                     | $\rho=0.12$<br>$P=0.74$                     | $\rho=-0.01$<br>$P=0.96$   | $\rho=0.18$<br>$P=0.60$                     | $\rho=0.06$<br>$P=0.86$                         |
| 11,12-DHET:(DHET+EET)       | $\rho=-0.22$<br>$P=0.55$                    | $\rho=0.18$<br>$P=0.60$                     | $\rho=0.1$<br>$P=0.79$     | $\rho=0.2$<br>$P=0.57$                      | $\rho=0.22$<br>$P=0.54$                         |
| 14,15-DHET:(DHET+EET)       | $\rho=-0.7$<br><b><math>P=0.008</math></b>  | $\rho=-0.68$<br><b><math>P=0.012</math></b> | $\rho=-0.19$<br>$P=0.60$   | $\rho=-0.62$<br><b><math>P=0.031</math></b> | $\rho=-0.56$<br>$P=0.065$                       |
| 9,10-DiHOME:(DiHOME+EpOME)  | $\rho=0.45$<br>$P=0.13$                     | $\rho=0.52$<br>$P=0.090$                    | $\rho=0.23$<br>$P=0.54$    | $\rho=0.46$<br>$P=0.13$                     | $\rho=0.48$<br>$P=0.12$                         |
| 12,13-DiHOME:(DiHOME+EpOME) | $\rho=0.47$<br>$P=0.13$                     | $\rho=0.6$<br>$P=0.042$                     | $\rho=0.3$<br>$P=0.37$     | $\rho=0.48$<br>$P=0.12$                     | $\rho=0.4$<br>$P=0.19$                          |
| sEH Activity (14,15-DHET)   | -                                           | $\rho=0.55$<br>$P=0.070$                    | $\rho=0.07$<br>$P=0.86$    | $\rho=0.61$<br><b><math>P=0.037</math></b>  | $\rho=0.65$<br><b><math>P=0.021</math></b>      |
| sEH Activity (11,12-DHET)   | -                                           | -                                           | $\rho=-0.03$<br>$P=0.93$   | $\rho=0.82$<br><b><math>P=0.0004</math></b> | $\rho=0.77$<br><b><math>P=0.002</math></b>      |
| sEH Activity (8,9-DHET)     | -                                           | -                                           | -                          | $\rho=0.08$<br>$P=0.84$                     | $\rho=-0.12$<br>$P=0.74$                        |
| sEH Activity (12,13-DiHOME) | -                                           | -                                           | -                          | -                                           | $\rho=0.89$<br><b><math>P\leq 0.0001</math></b> |
| sEH Activity (14,15-DiHOME) | -                                           | -                                           | -                          | -                                           | -                                               |

*P*-values are adjusted according to Benjamini and Hochberg.  $\rho$  indicates Spearman's rank correlation  $\rho$ .

**Figure S1.**

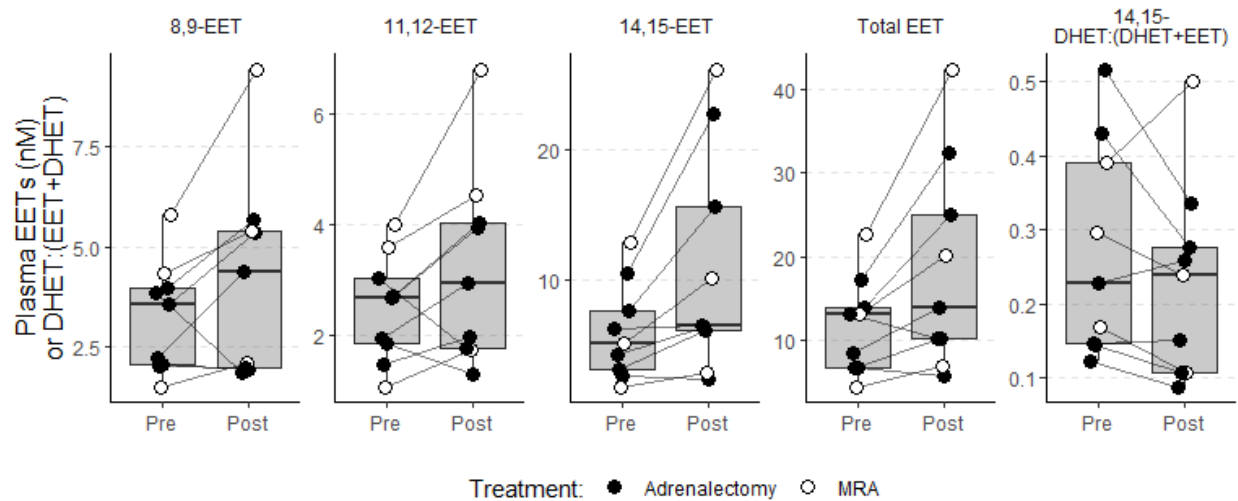

**Figure S1. Plasma total and 14,15-EET regioisomer concentrations increase after treatment of primary aldosteronism.** Soluble epoxide hydrolase activity, estimated as 14,15-EET:(14,15-DHET+14,15-EET) concentration, did not change significantly. Black circles indicate patients who underwent adrenalectomy and open circles indicate those who were treated with a mineralocorticoid receptor antagonist (MRA). 14,15-EET and total EET concentrations increased significantly after treatment.



**Figure S2**

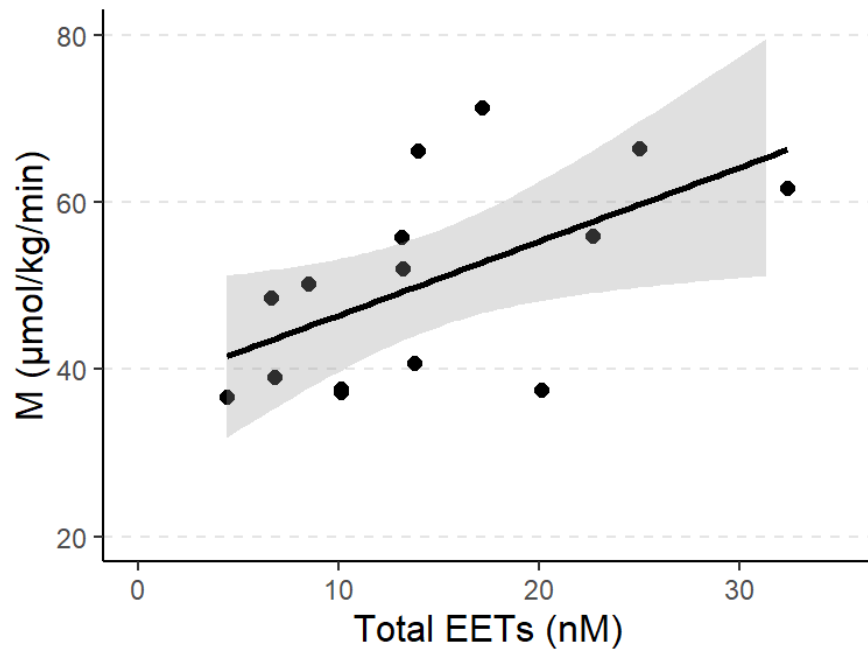

**Figure S2. Total EETs directly correlate with insulin sensitivity.** Relationship between total epoxyeicosatrienoic acid (EET) concentrations and insulin sensitivity, as measured by the glucose infusion rate (M) during hyperinsulinemic clamp steady state insulin infusion at a rate of 120 mU/m<sup>2</sup>/min (average achieved insulin concentration of 2,089±466 pmol/L). Data includes results obtained during hyperinsulinemic clamps were before and after treatment of primary aldosteronism. Spearman's rank correlation  $\rho$ : 0.64,  $P=0.027$ .

**Figure S3**

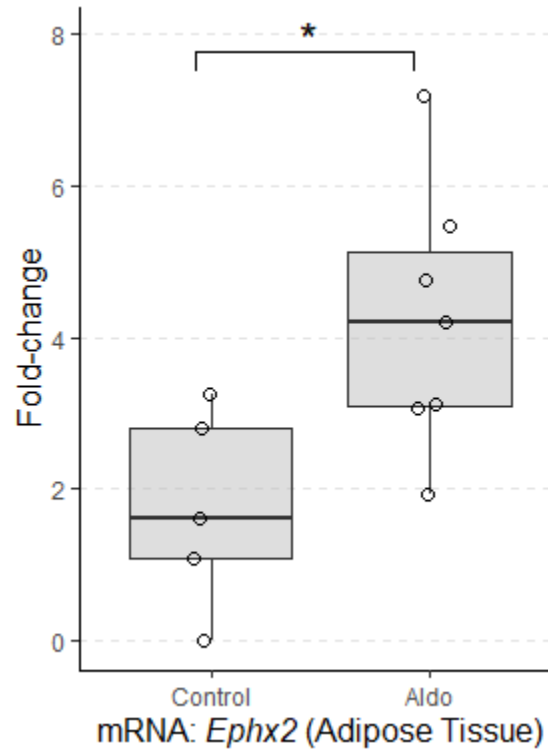

**Figure S3: Aldosterone increases sEH mRNA expression in adipose tissue.**

mRNA expression of *Ephx2* was estimated in adipose tissues collected from saline control (n = 5) and aldosterone treated (n=7) mice via osmotic minipump for 3 days. The traditional  $2^{-\Delta\Delta C_t}$  method was employed to evaluate fold-change *Ephx2* mRNA expression, with GAPDH as the housekeeping gene. \* $P=0.03$  by Wilcoxon rank sum test for difference between treatments, indicating a significant increase in *Ephx2* mRNA expression.
